# Supplementary material for: Genomic Analysis of Waterpipe Smoke-Induced Lung Tumor Autophagy and Plasticity
Source: MDPI journal article supplement (doi:10.3390/ijms23126848), 2022-06-20
Supplement: s1 [file s1]

## Supplementary figure legends

Figure S1. Indel mutational signature plots across all eight samples, 3 month treated and 6 month treated A549 cell line.

Figure S2. Indel mutational signature plots across all eight samples, 3 month treated and 6 month treated H460 cell line.

Figure S3. Rainfall plots showing the distribution of SNPs across 23 chromosomes in two cell lines A) 3 month treated A549, B) 6 month treated A549, C) 3 month treated H460 and D) 6 month treated H460. The vertical arrows represent regions of Katoagis or localized hypermutation. The y-axis shows the  $\log_{10}(\text{inter event distance})$ .

Figure S4. Forest plots showing differentially mutated genes in 3 month treated versus 6 month treated samples in two cell lines A) A549 and B) H460.
