# Supplementary figures and images for: Genomic Analysis of Waterpipe Smoke-Induced Lung Tumor Autophagy and Plasticity
Source: MDPI journal article supplement (doi:10.3390/ijms23126848), 2022-06-20

A)

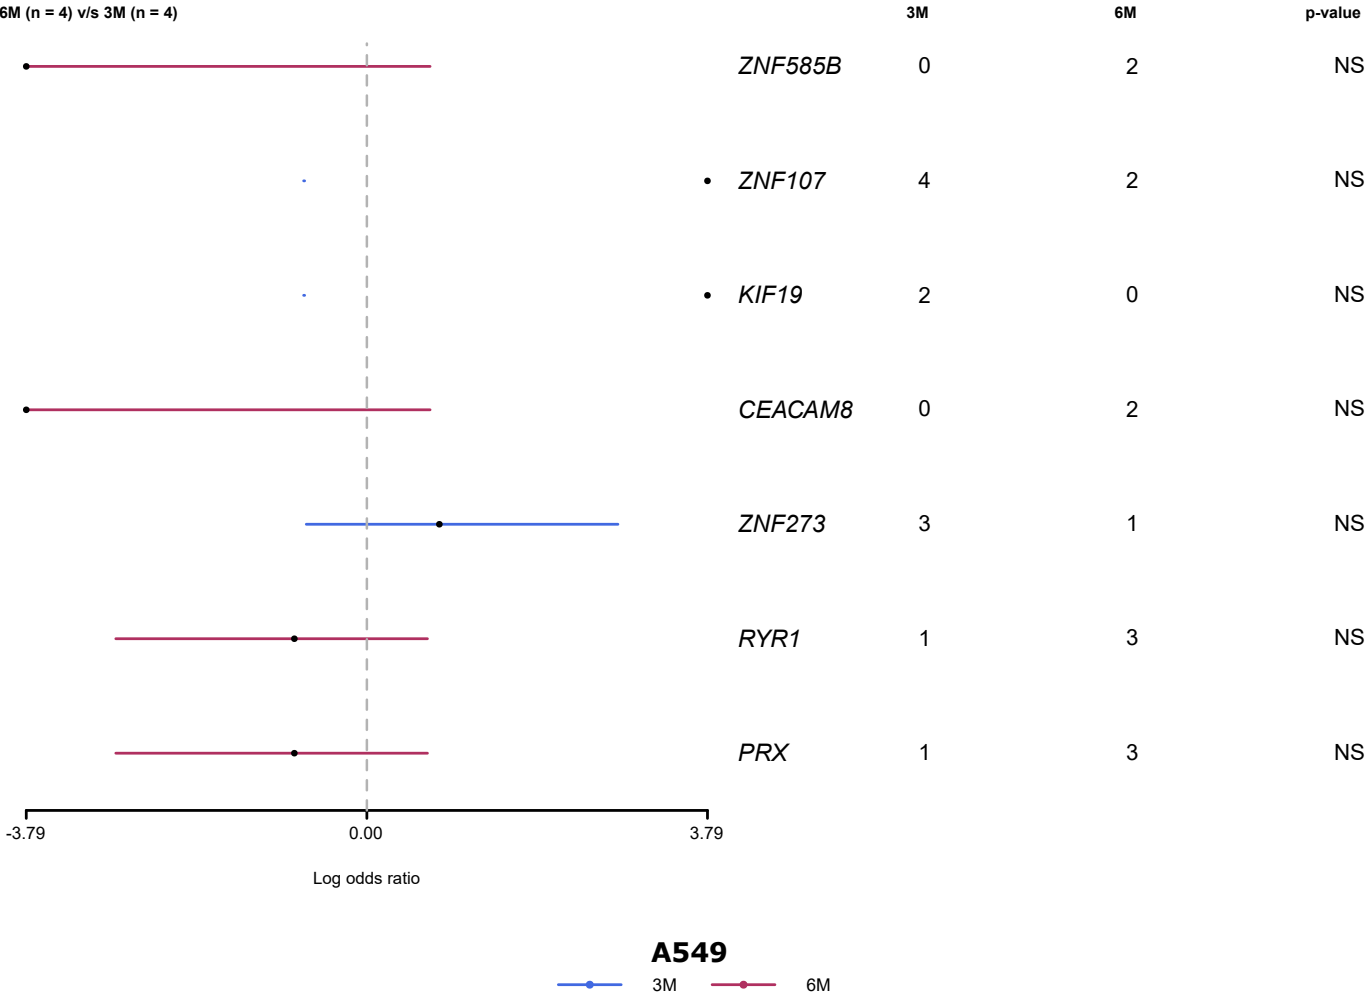

B)

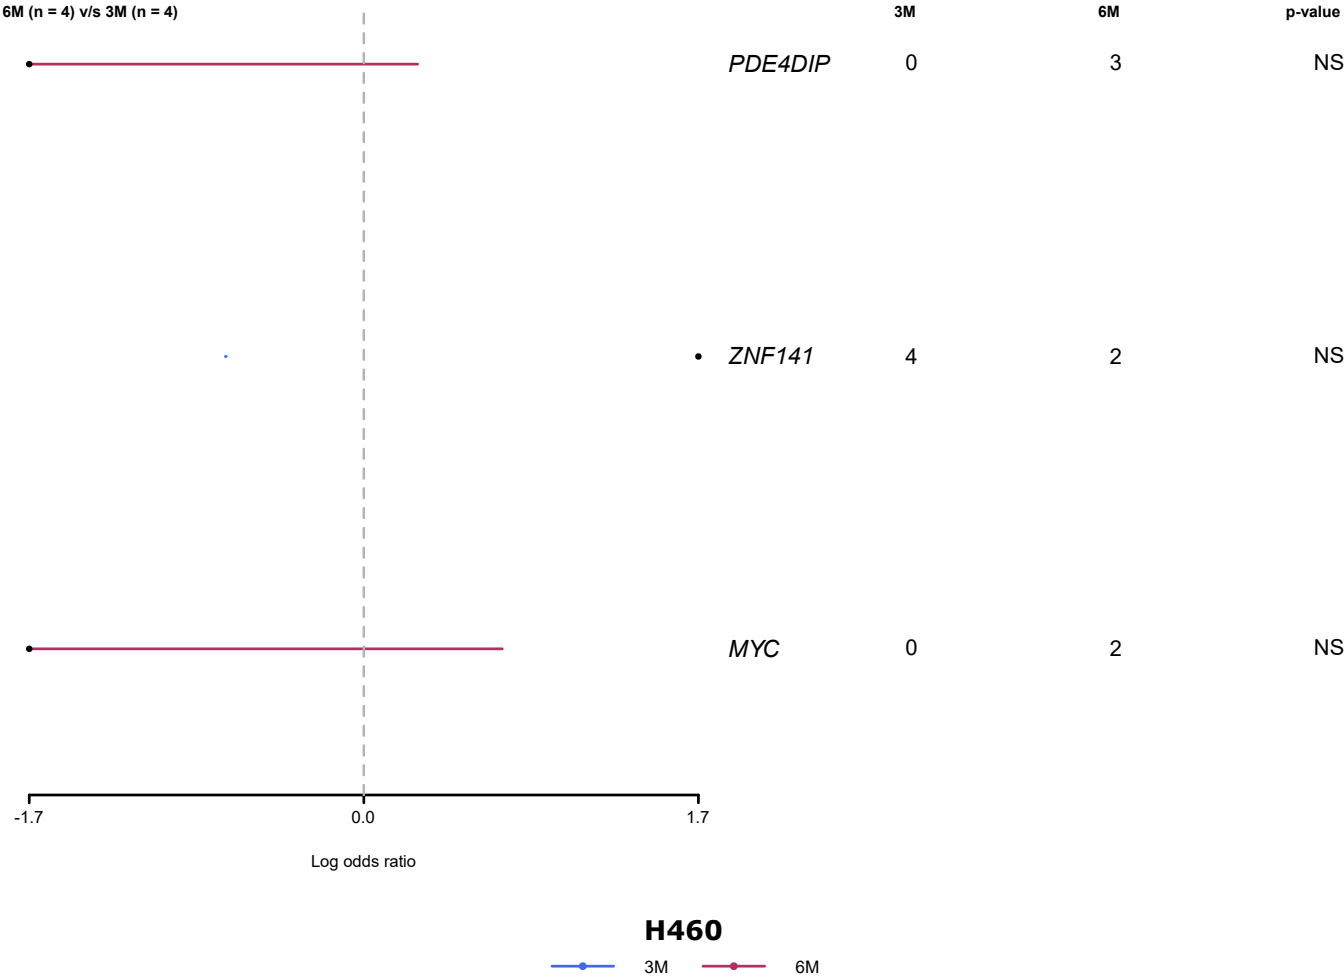

Supplement: s1 [file s1]

A)

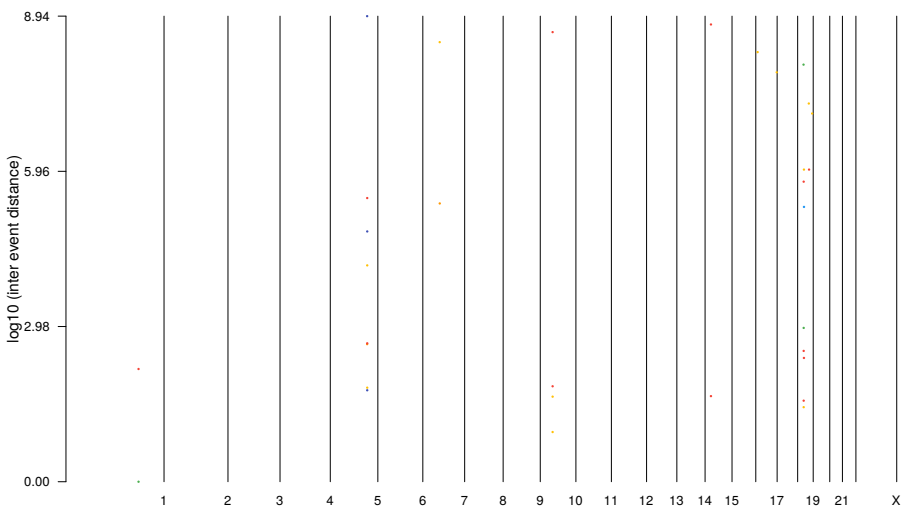

A549 - 3 month

B)

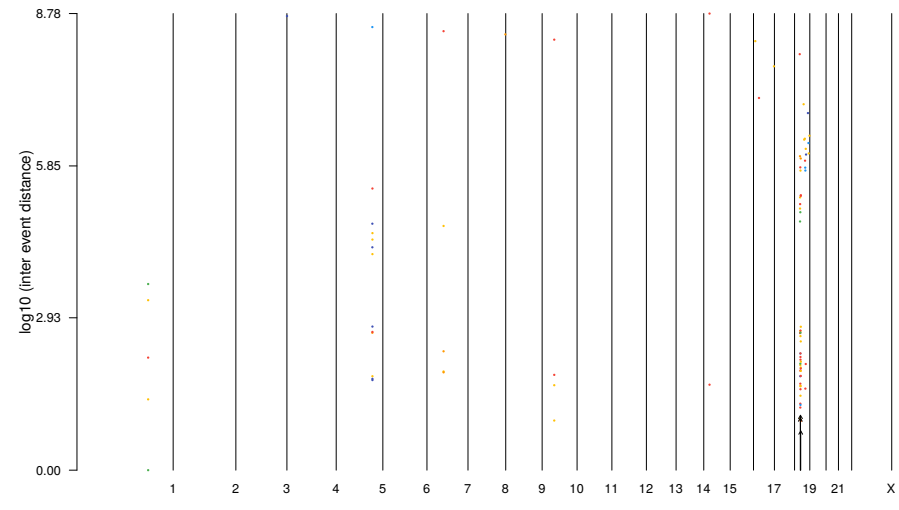

A549 - 6 month

C)

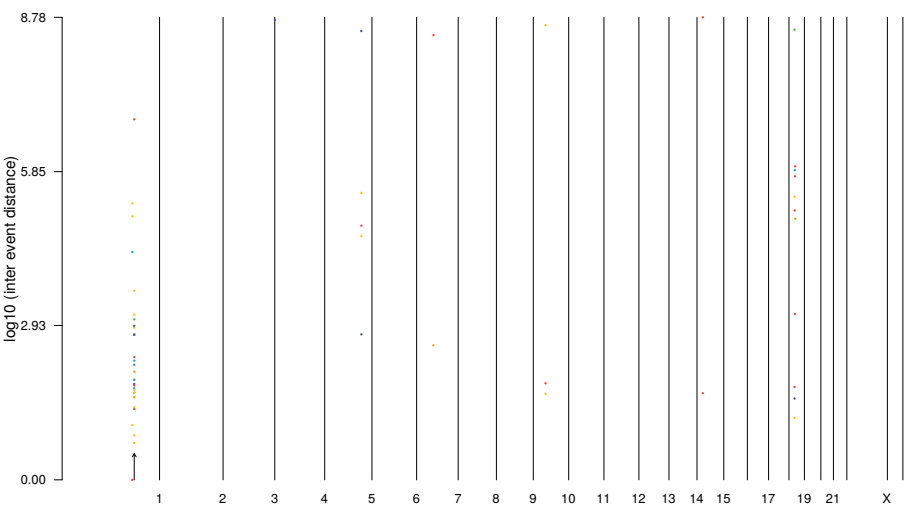

H460 - 3 month

D)

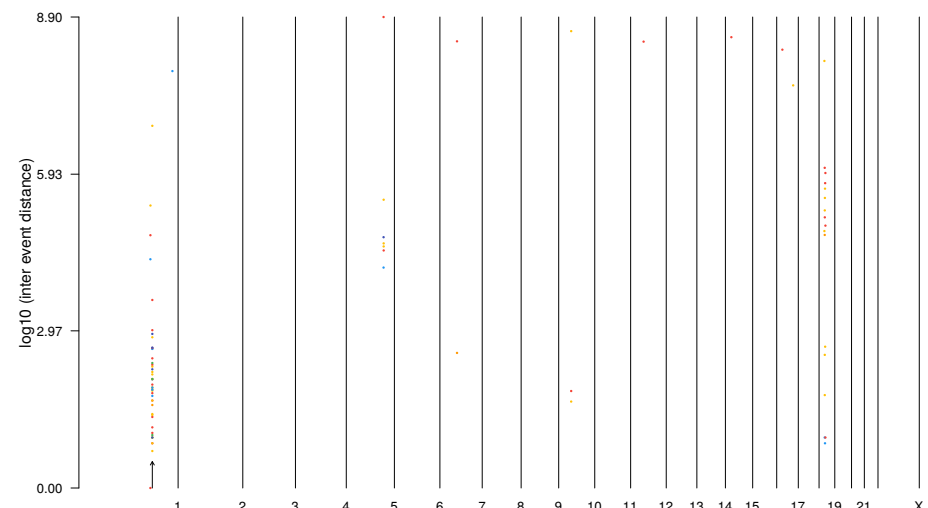

H460 - 6 month

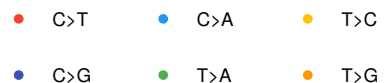

Supplement: s1 [file s1]

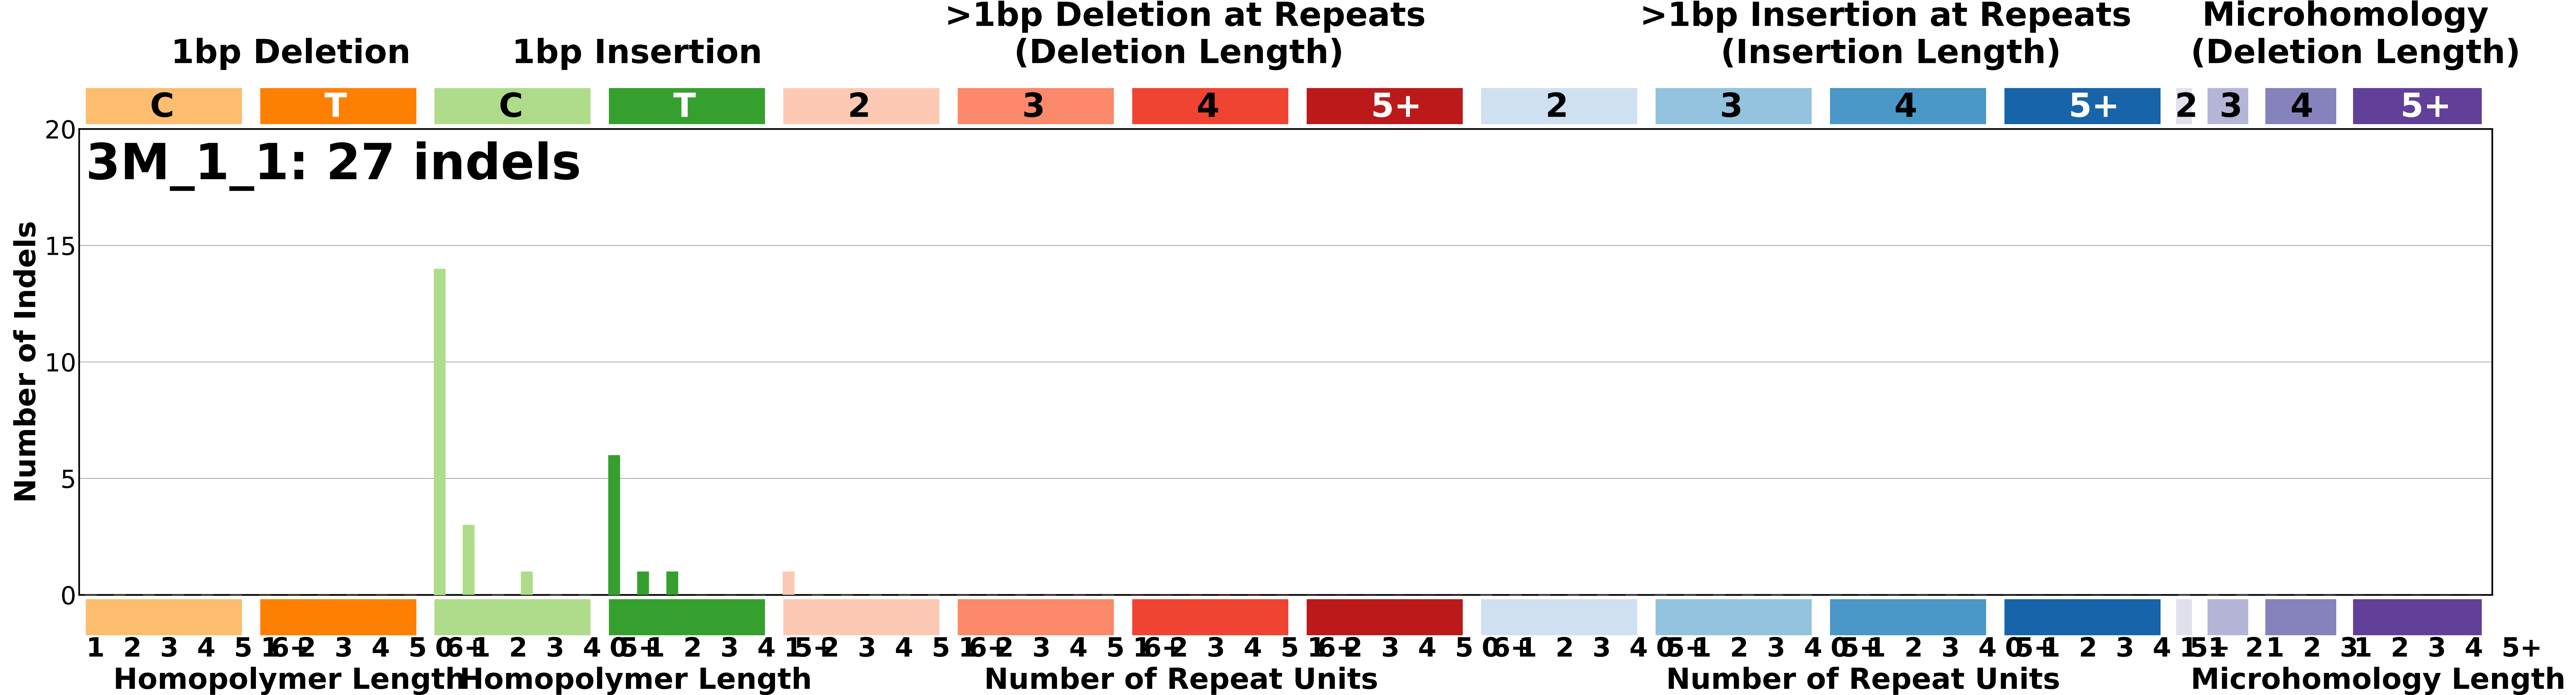

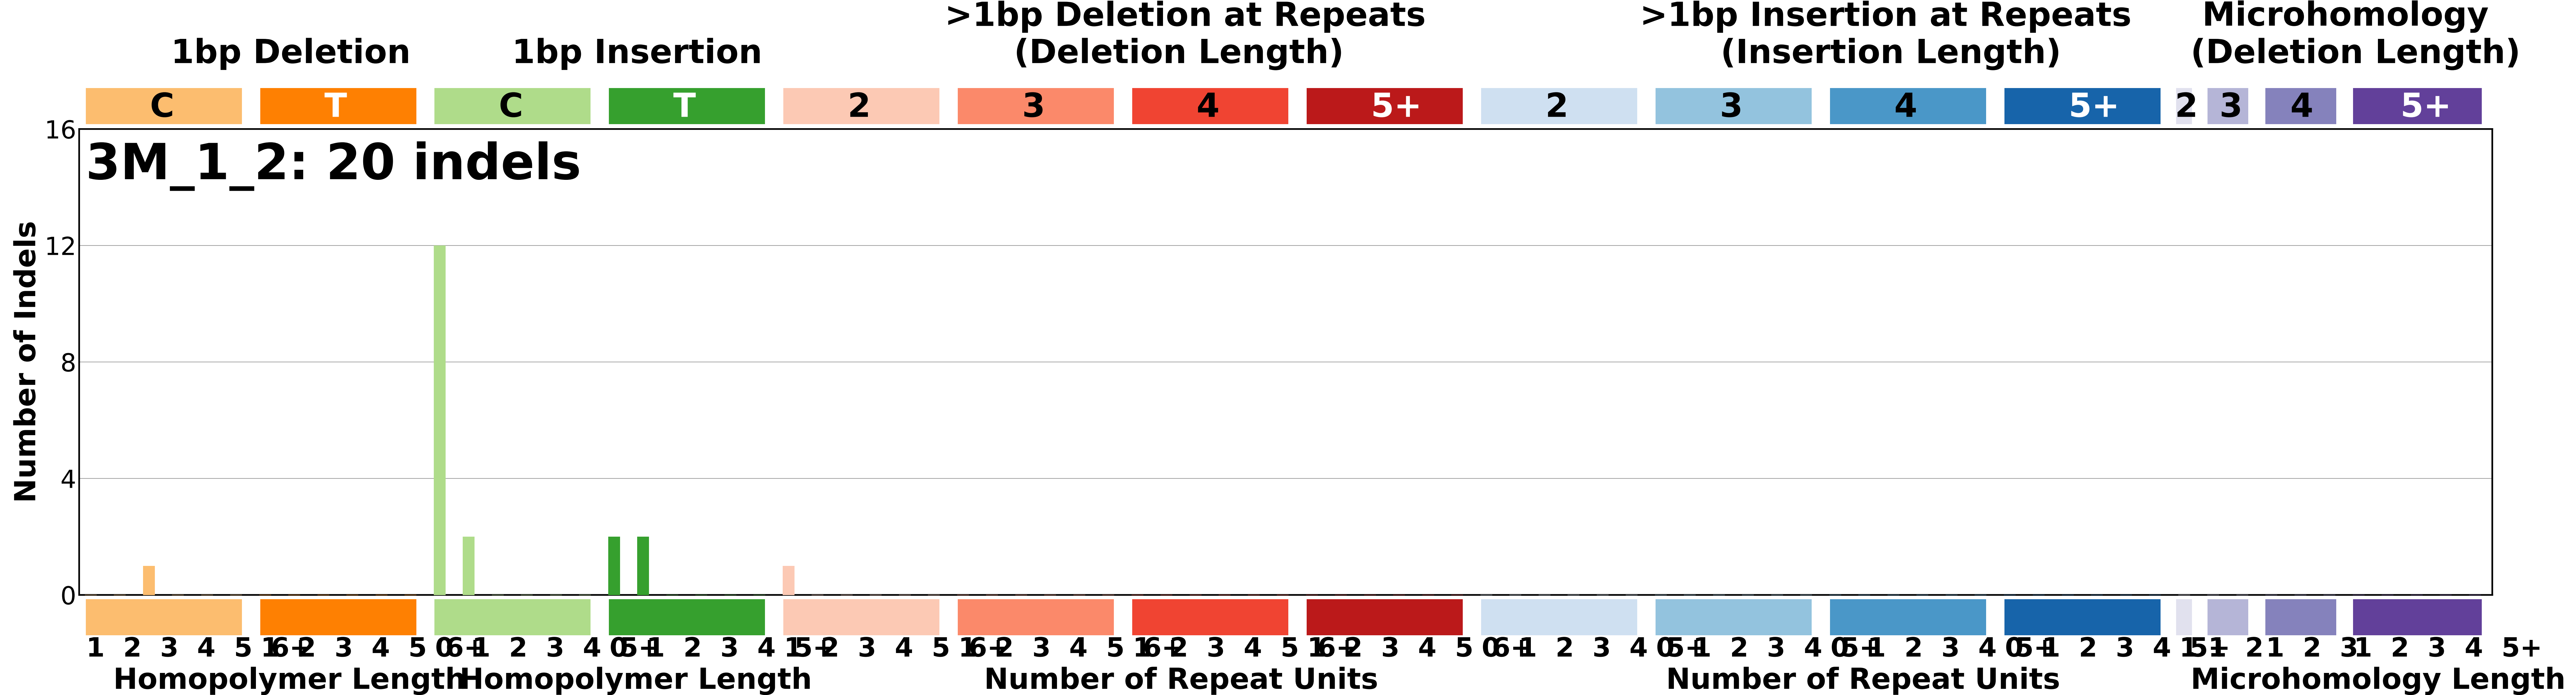

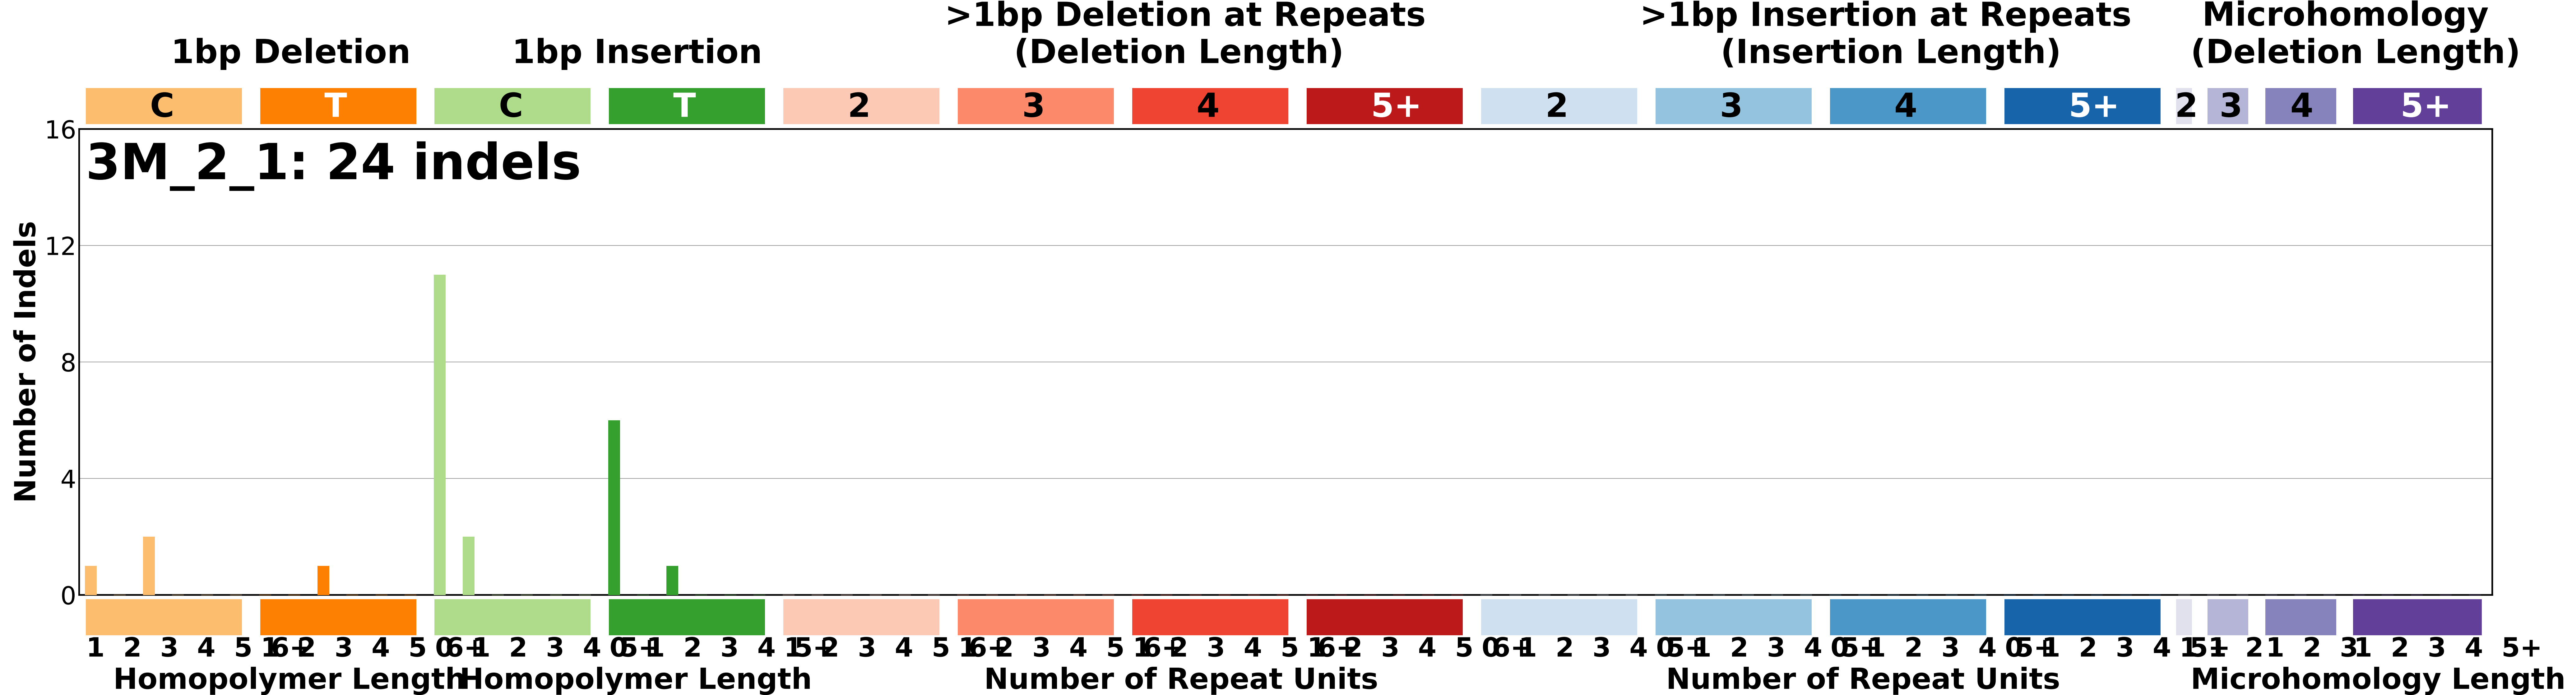

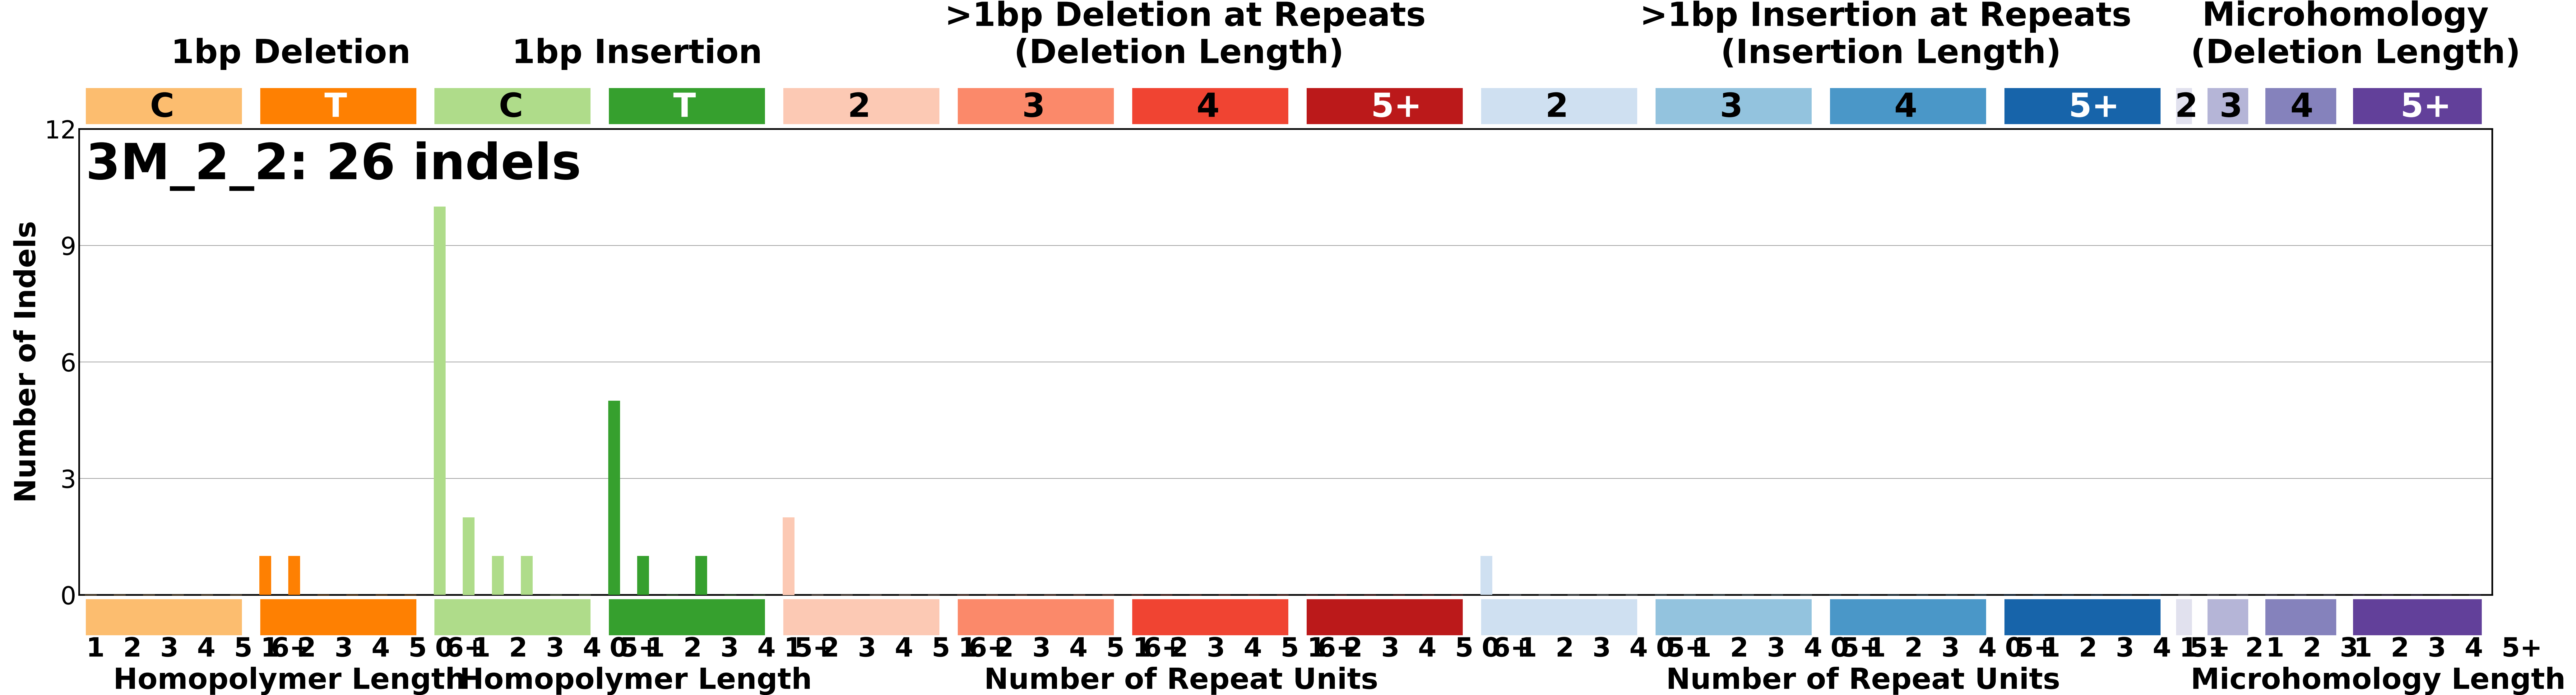

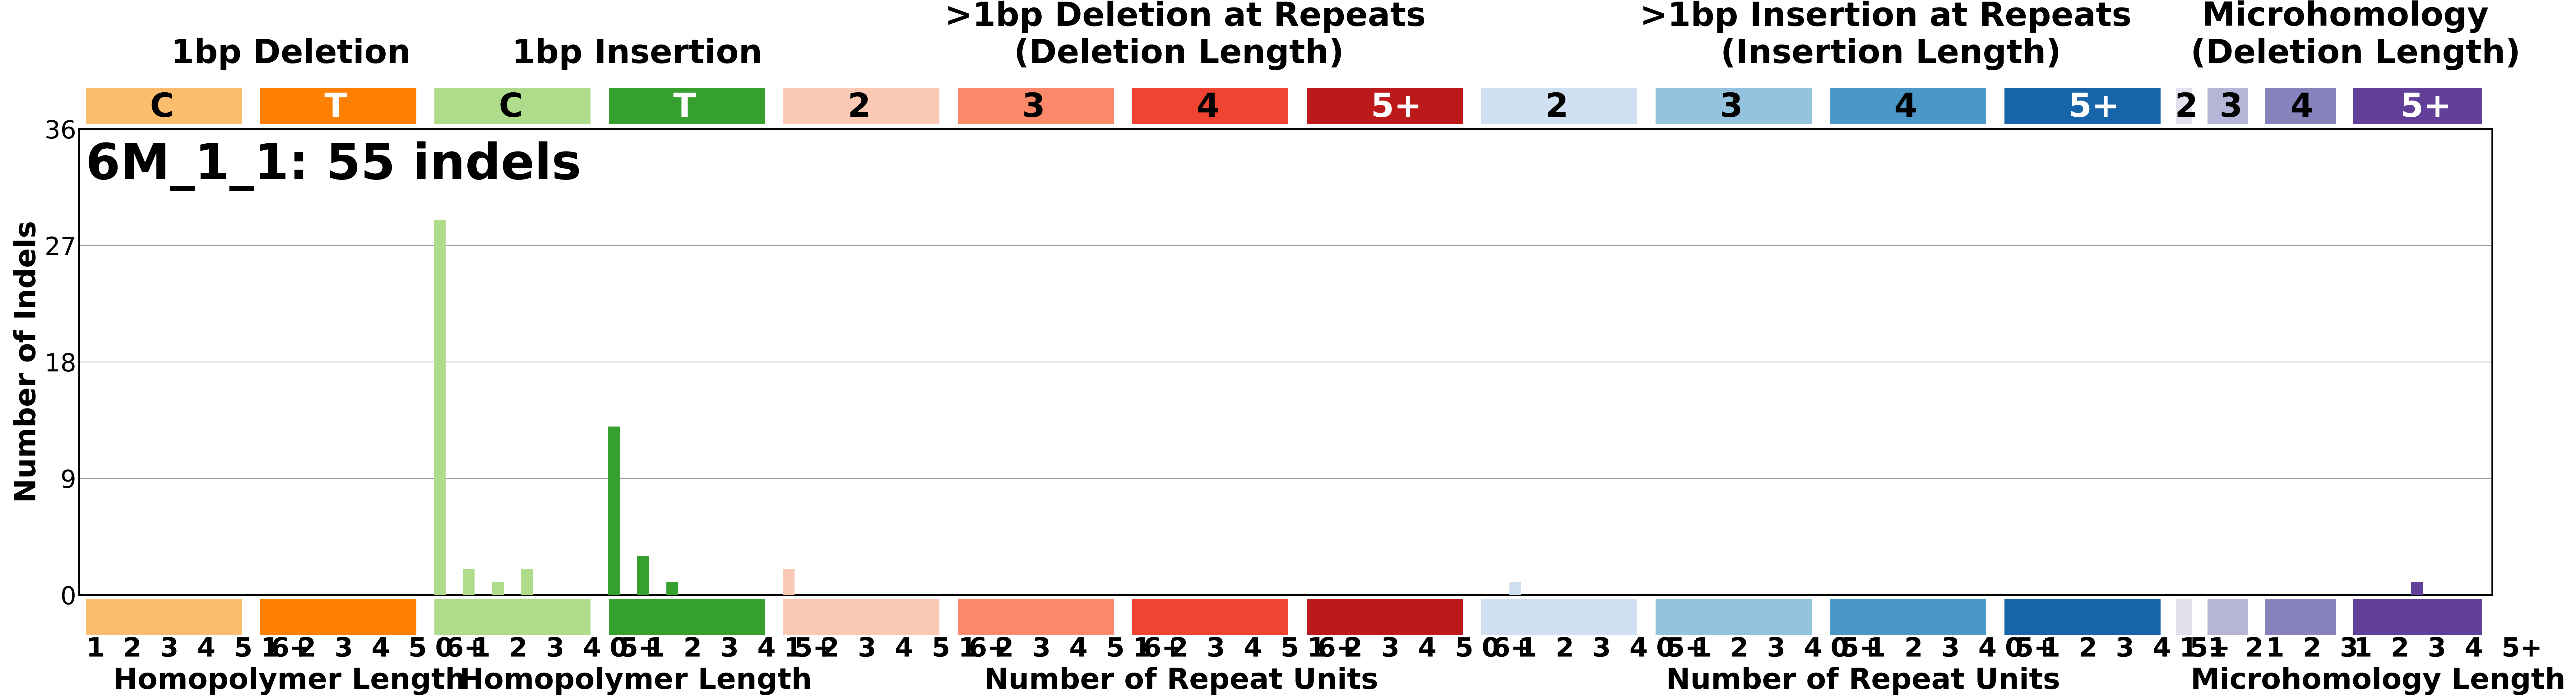

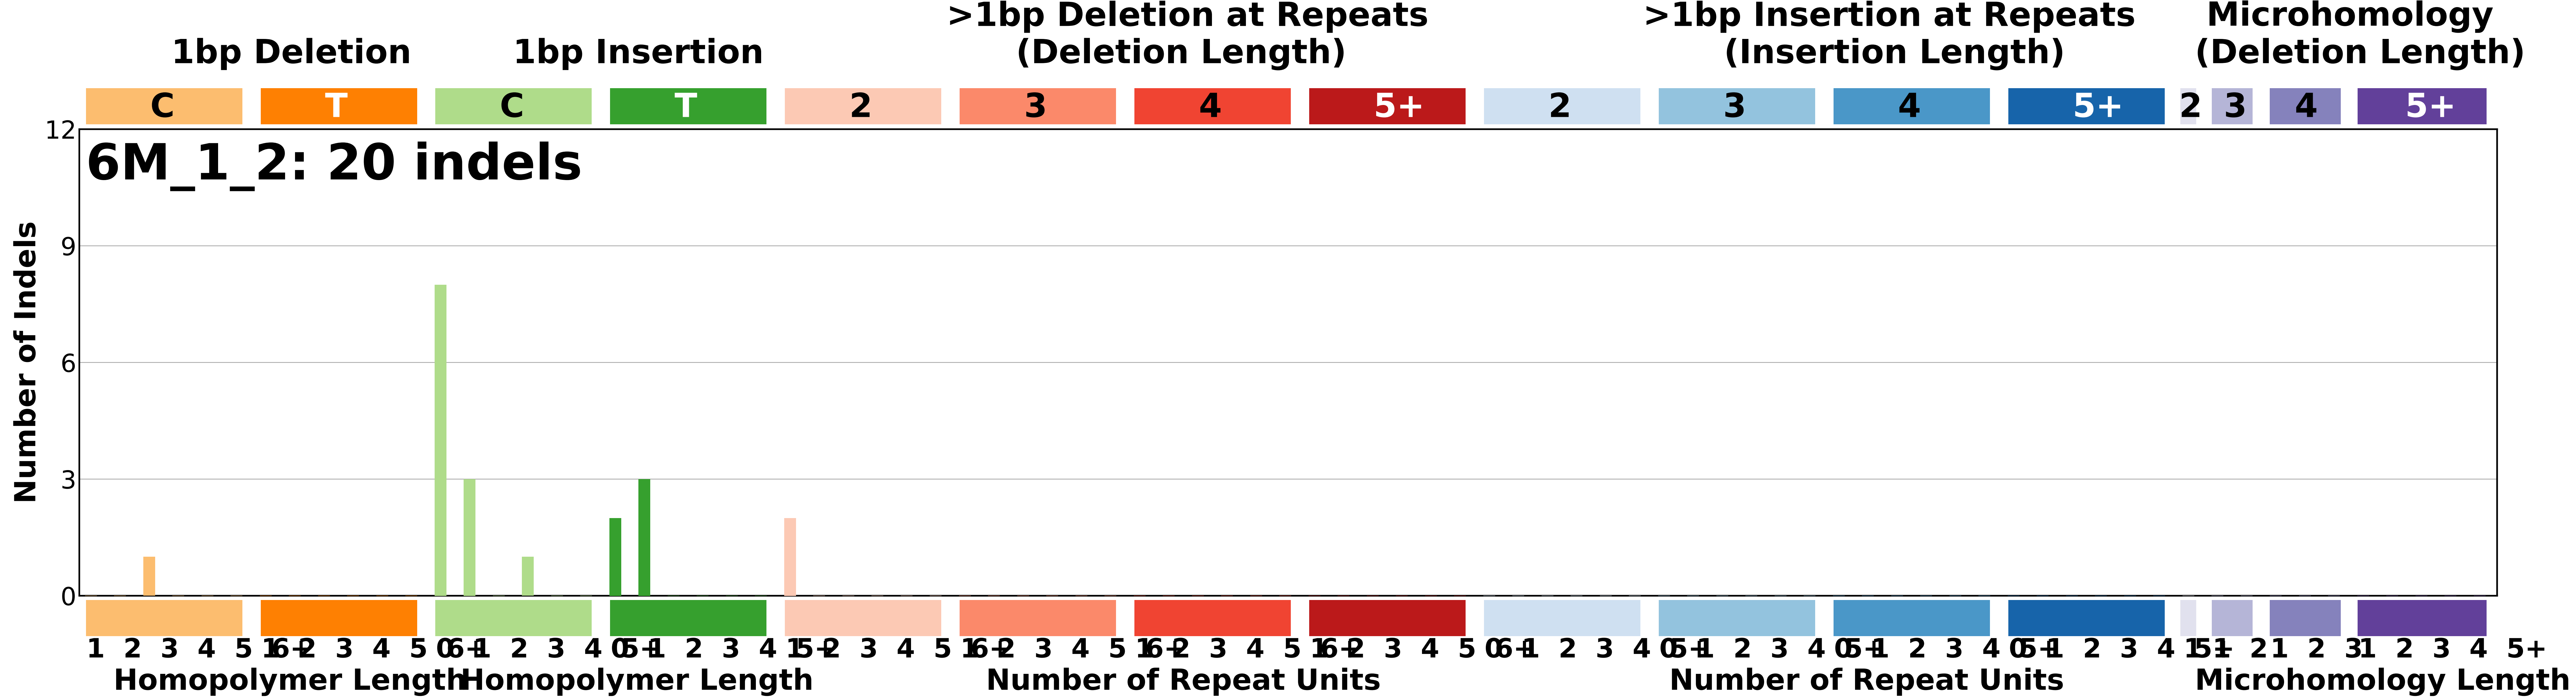

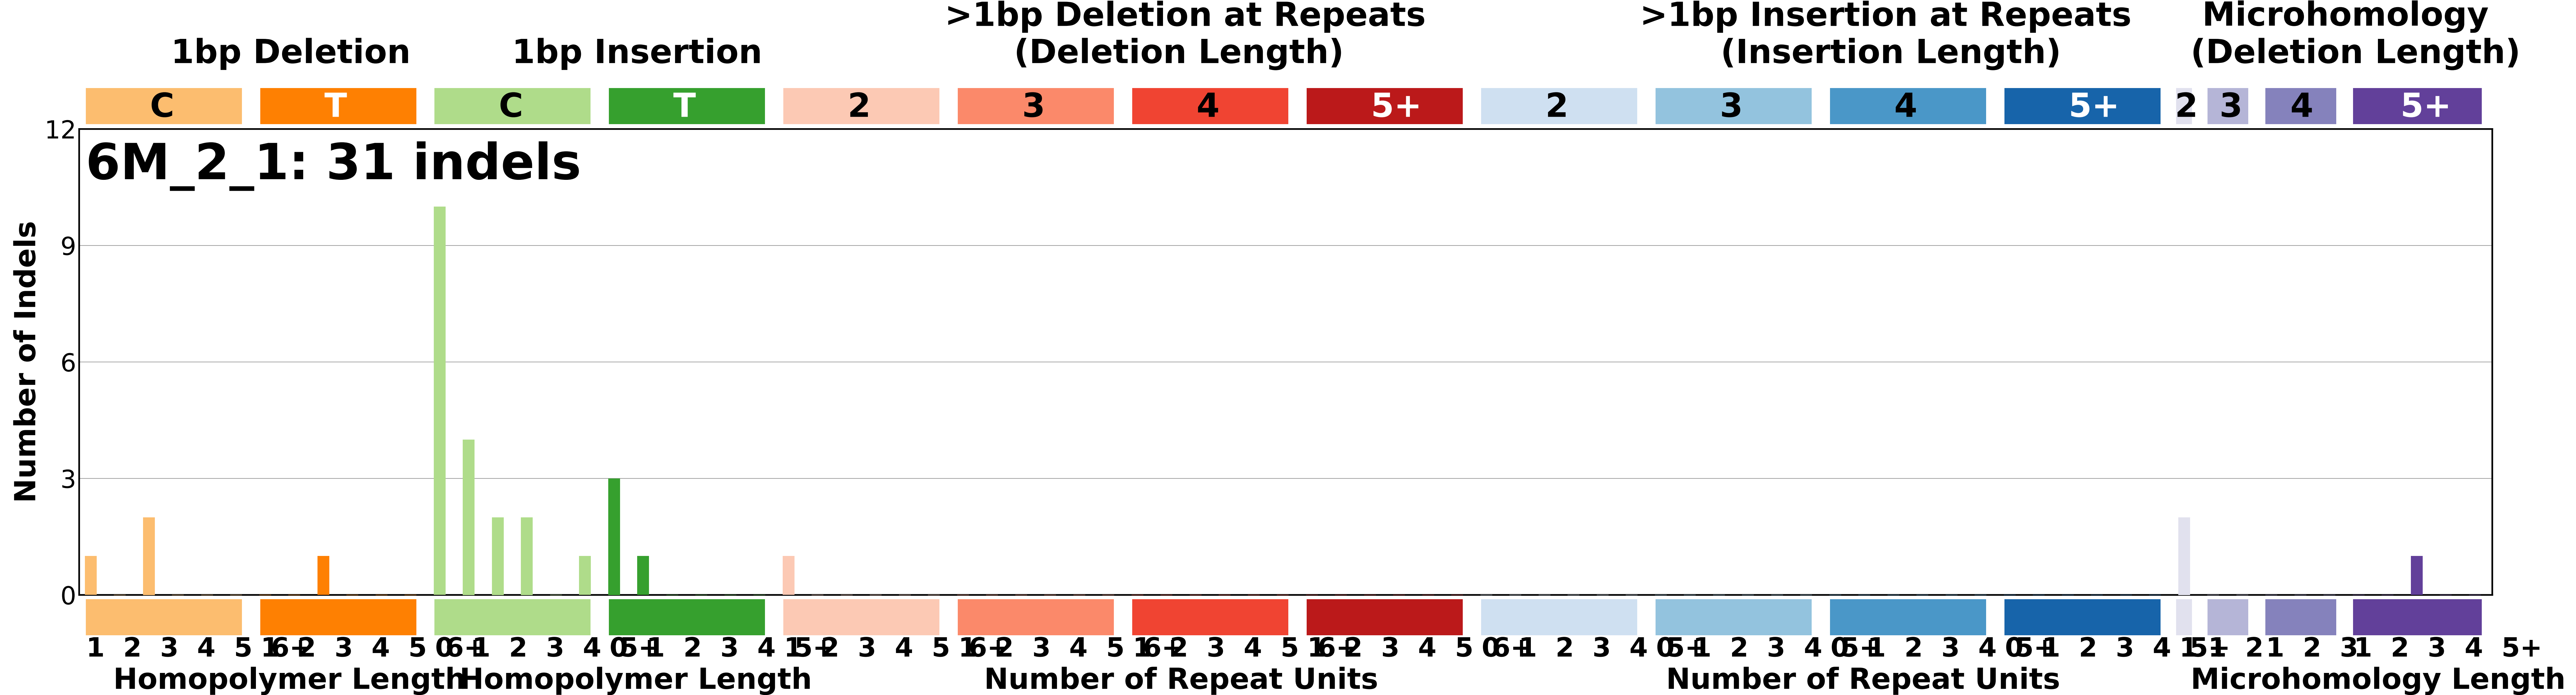

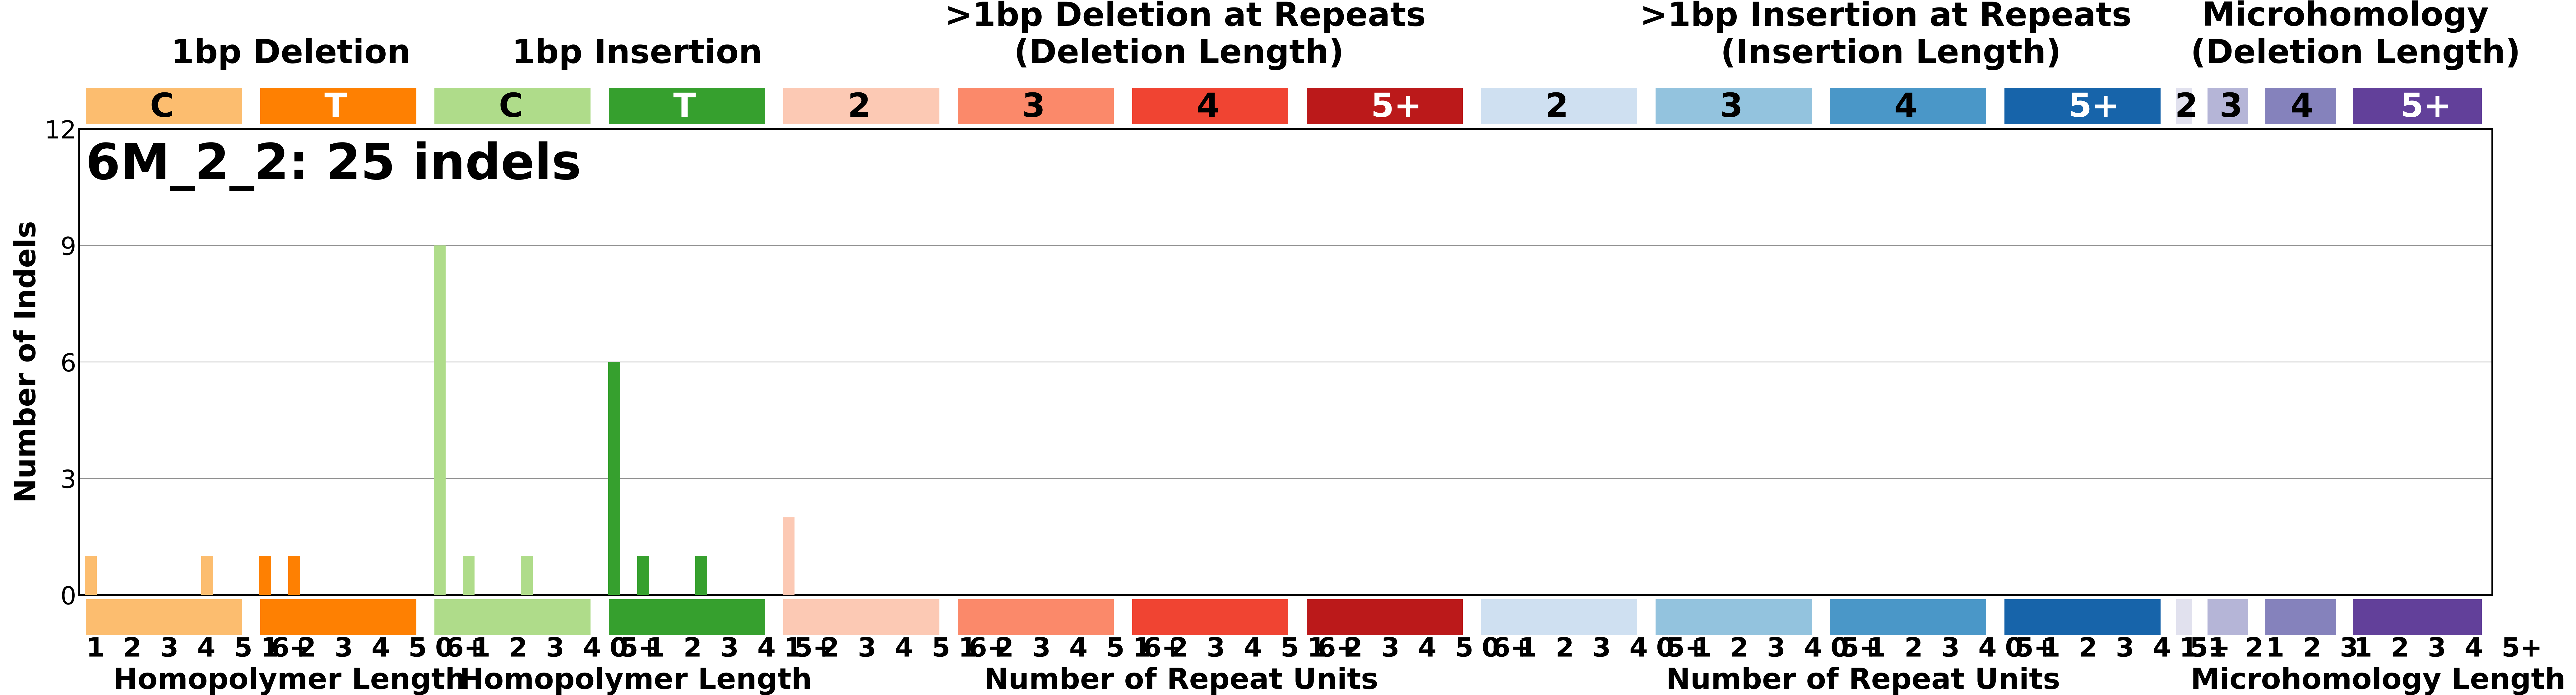

Supplement: s1 [file s1]

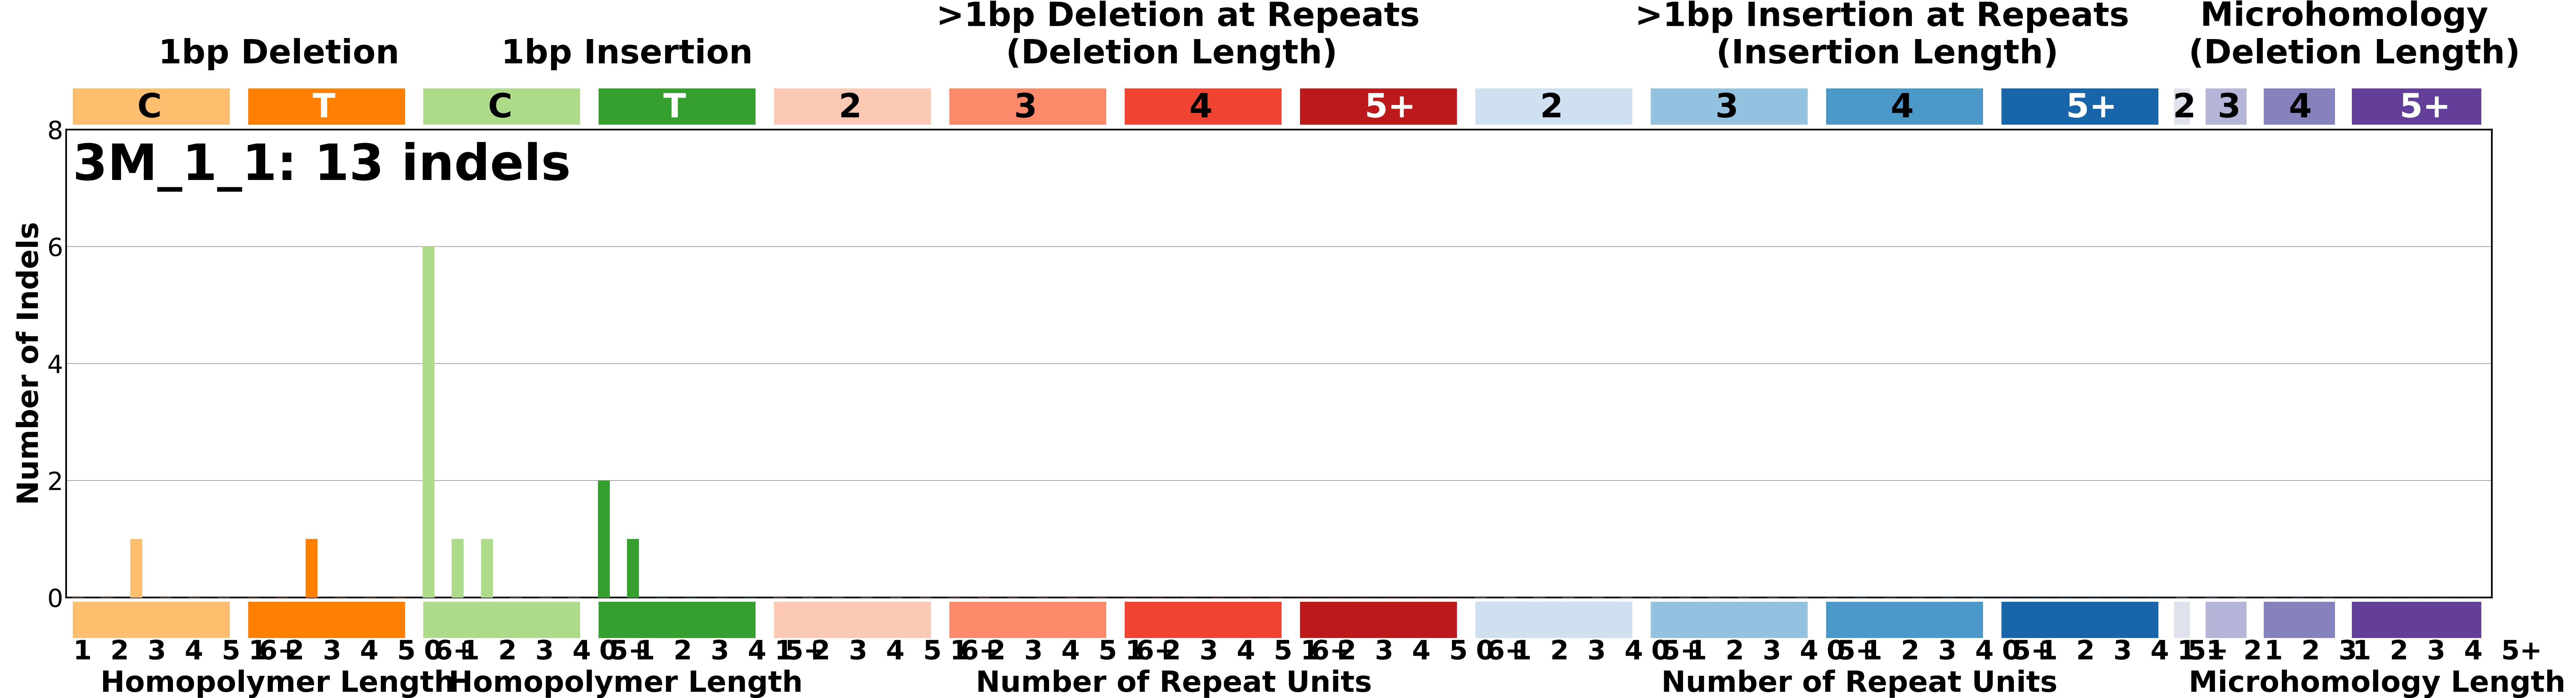

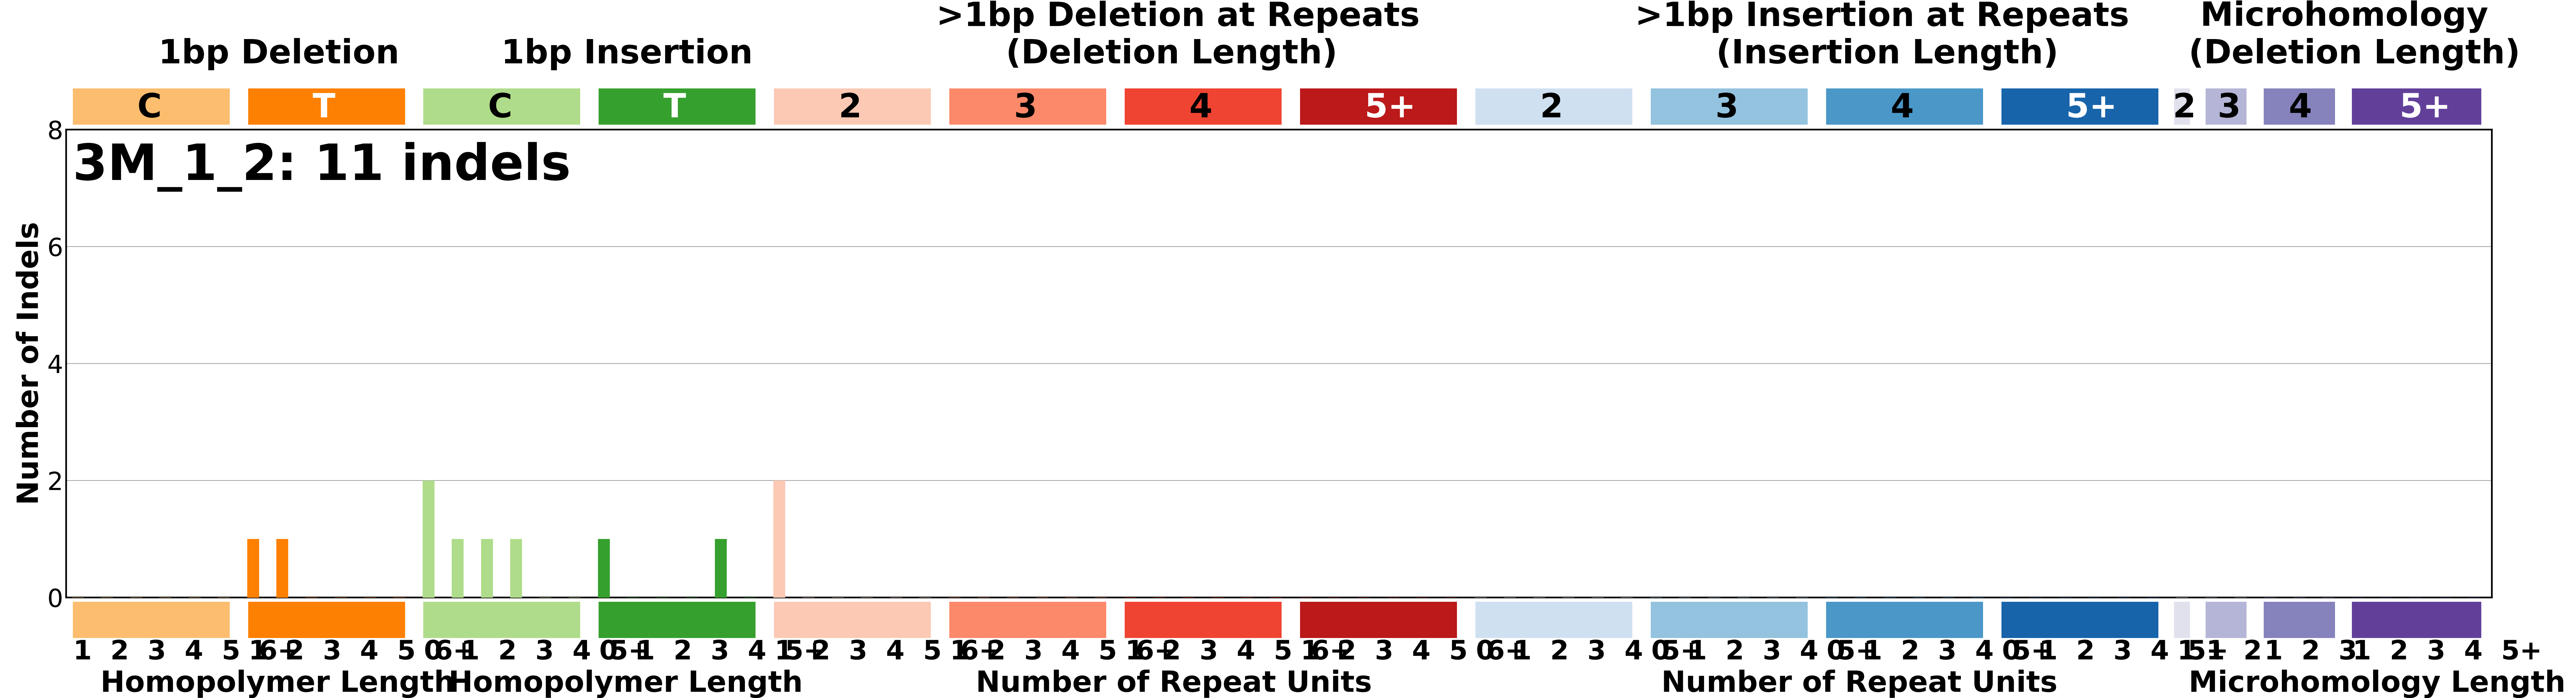

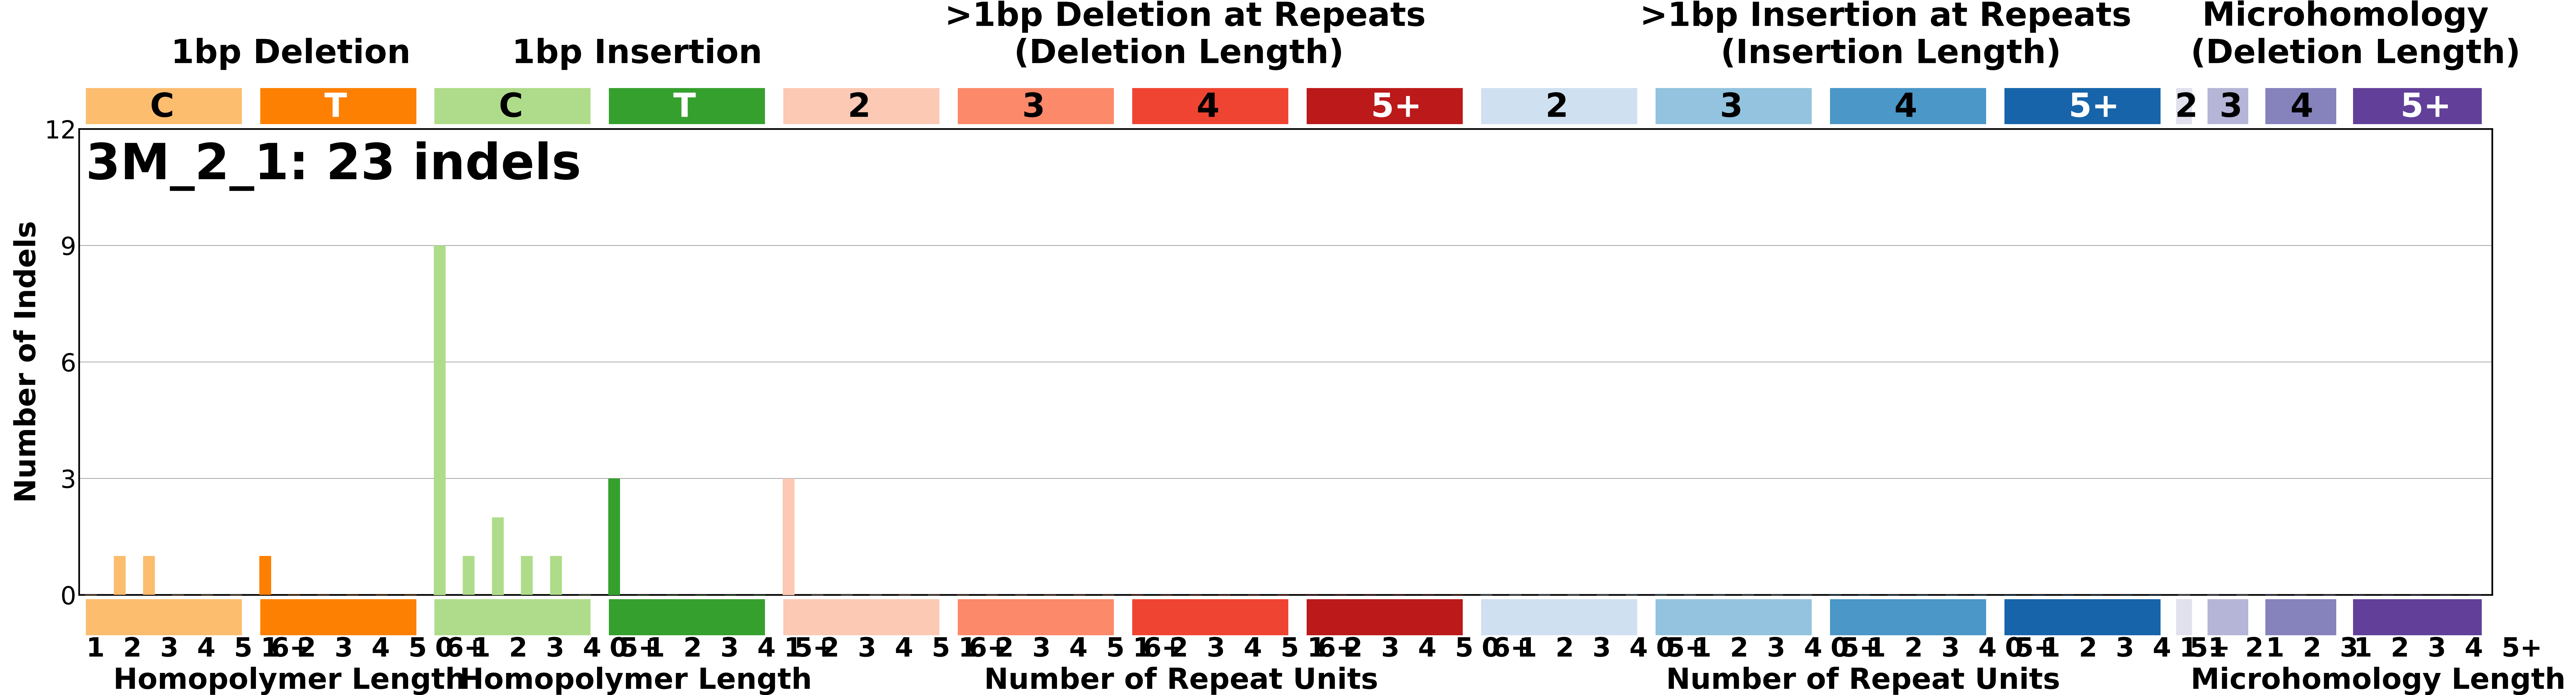

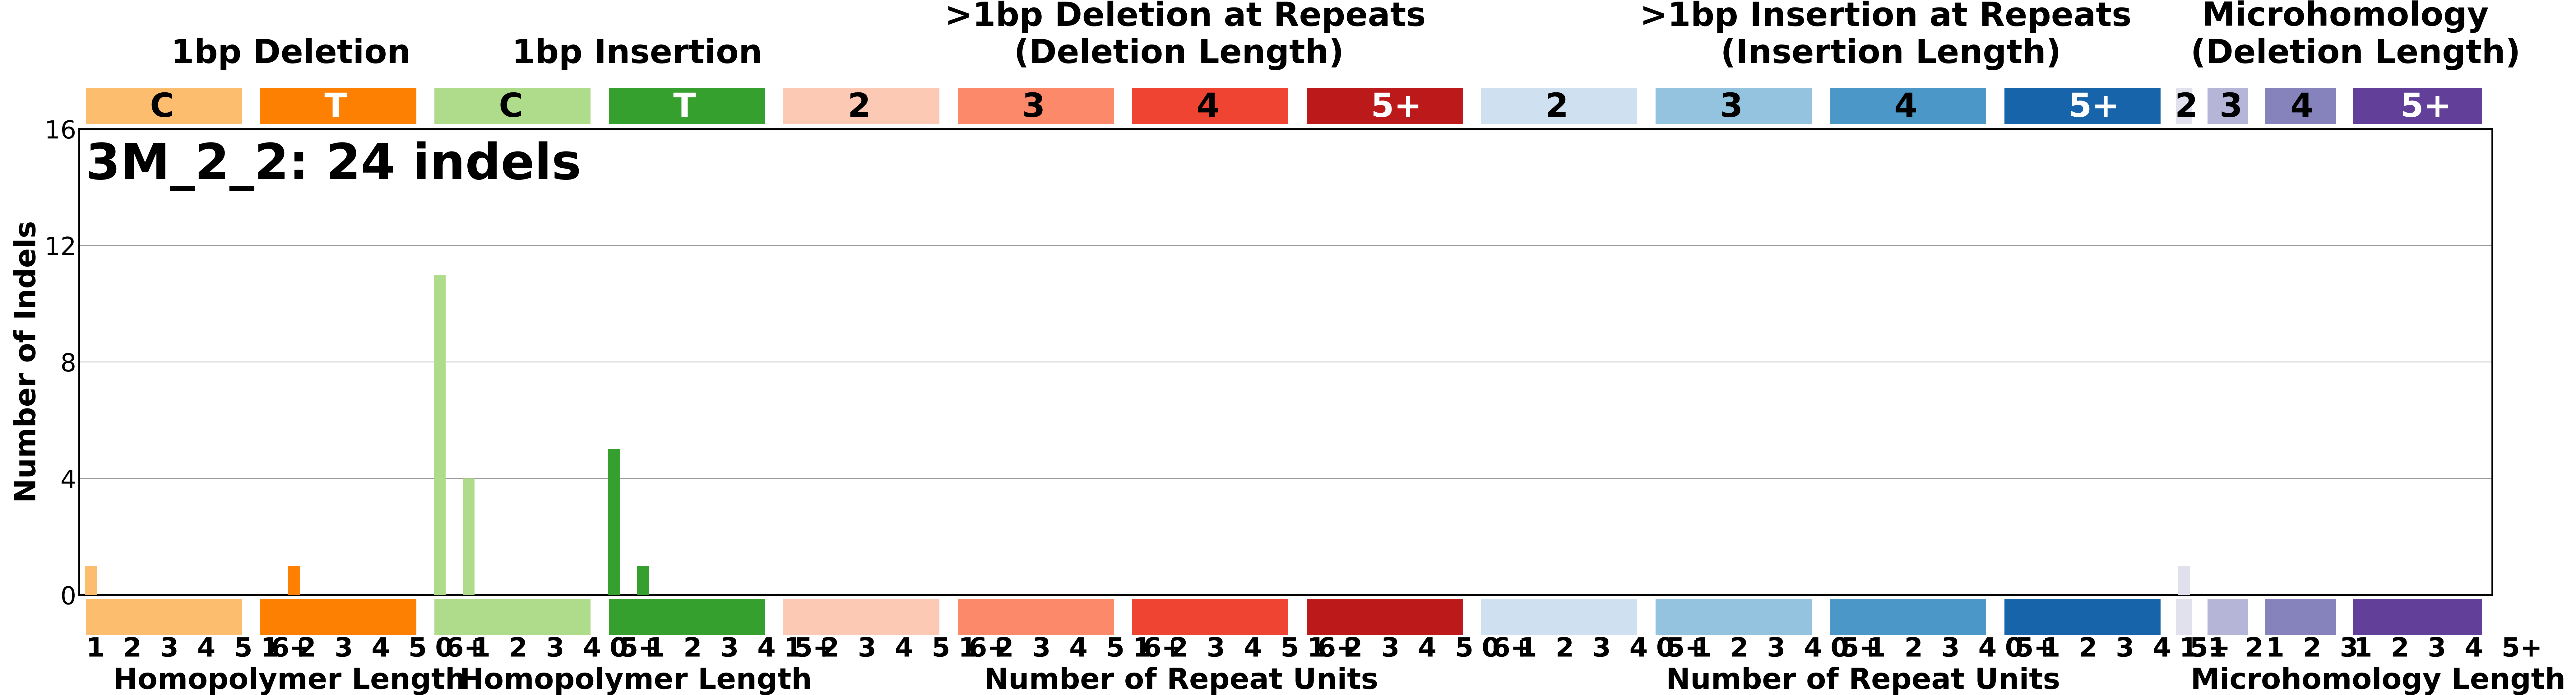

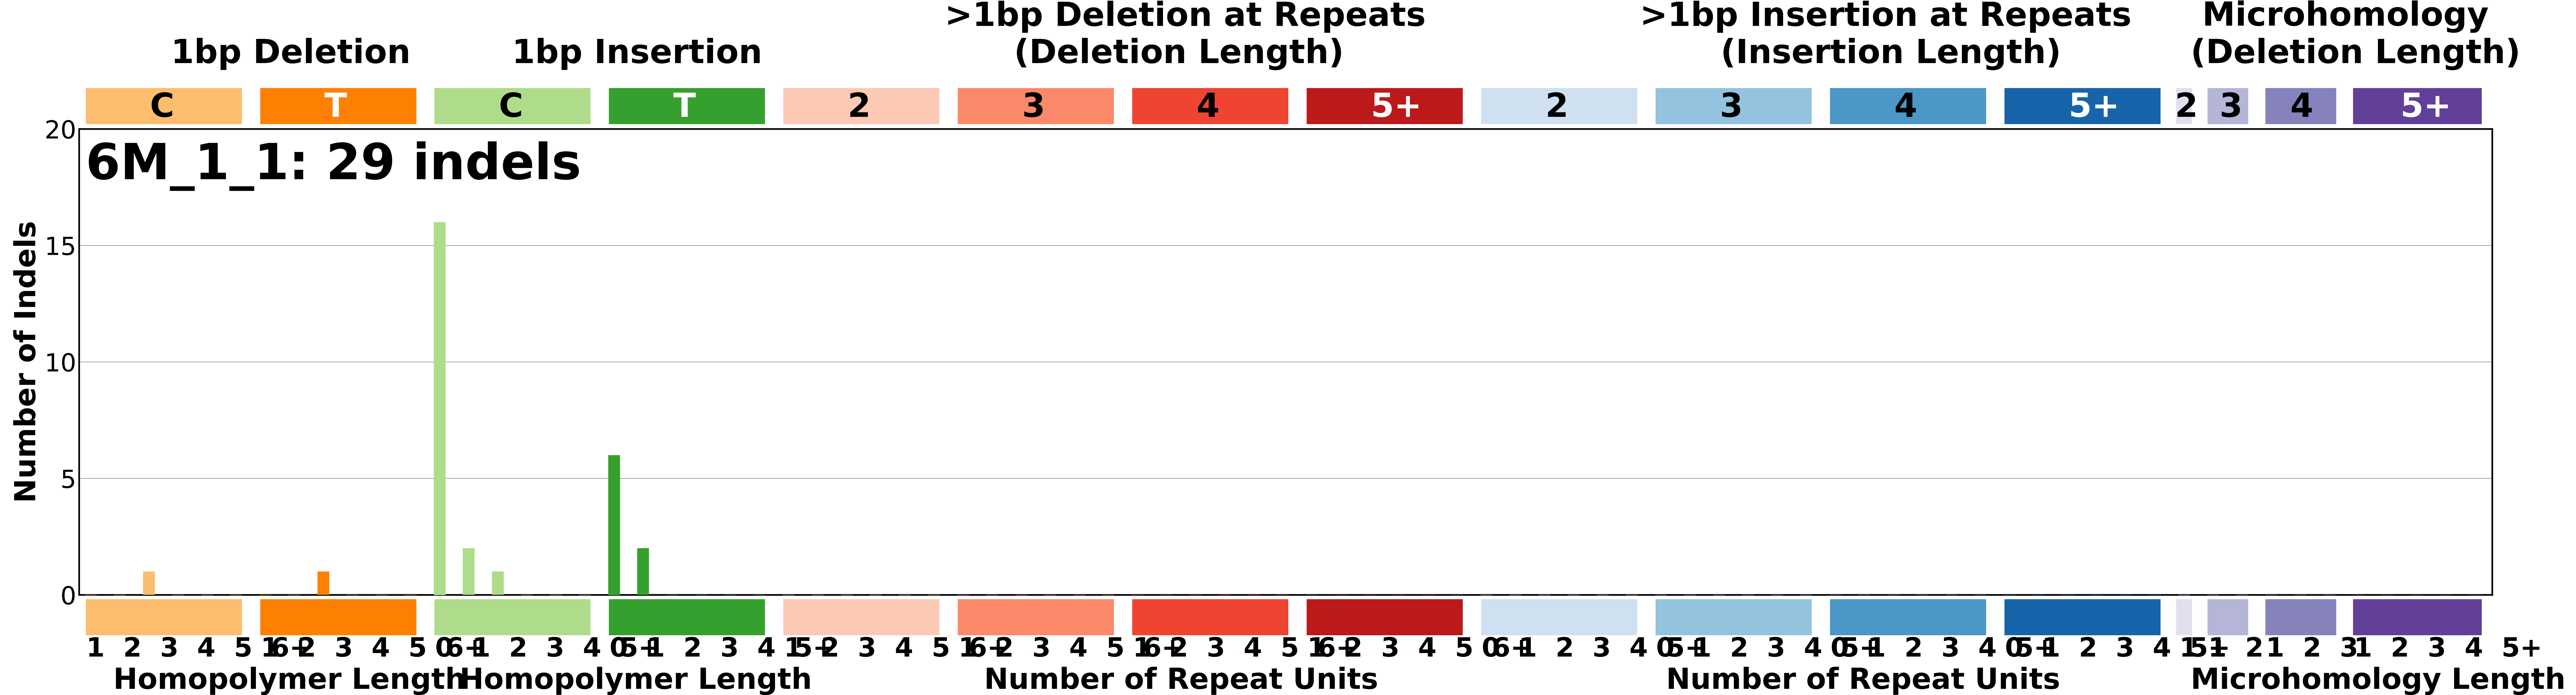

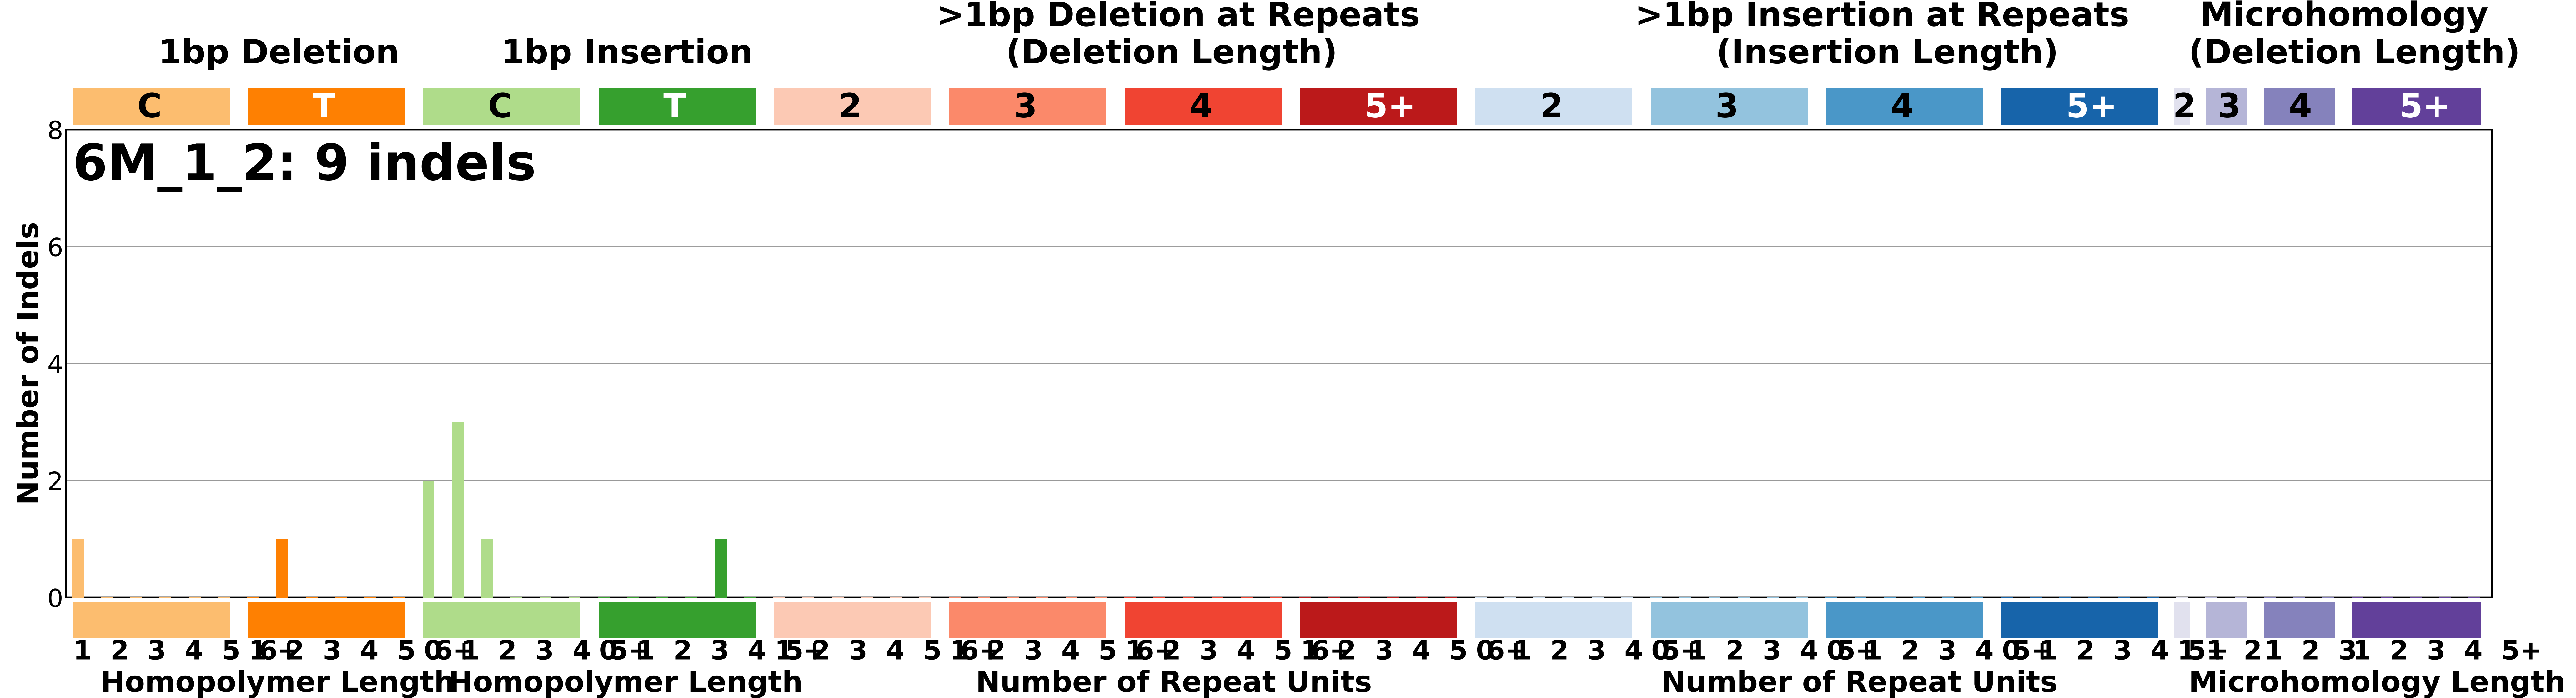

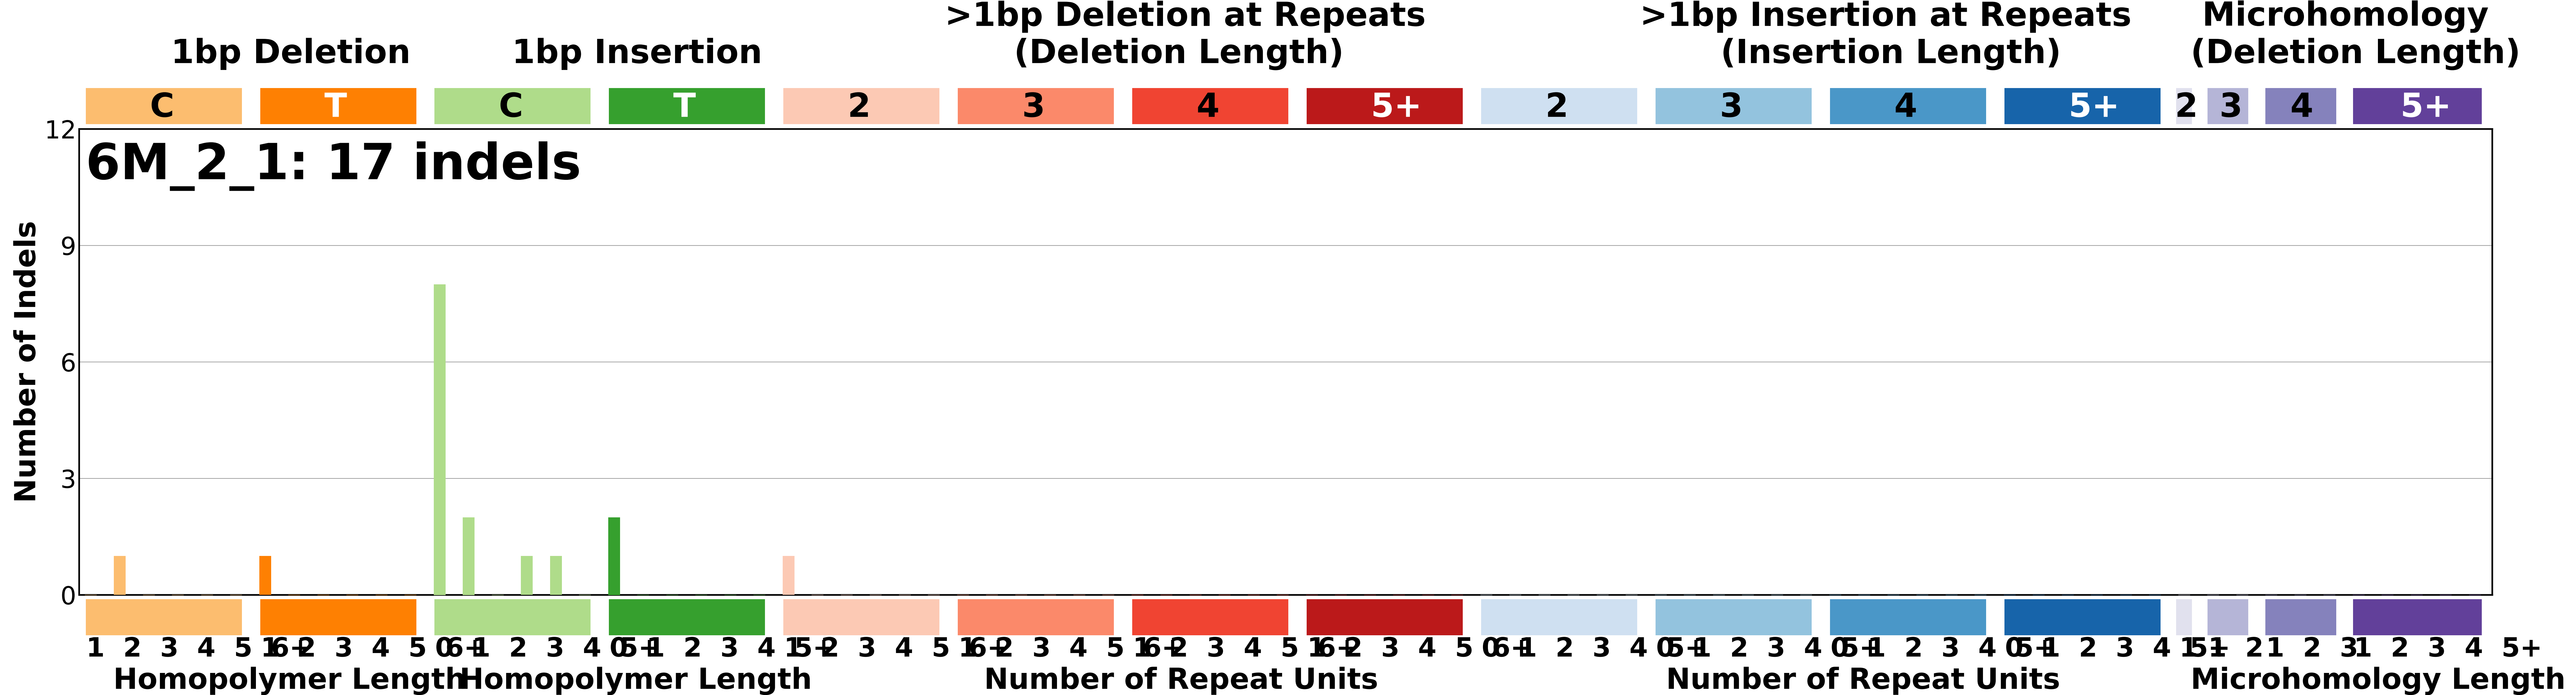

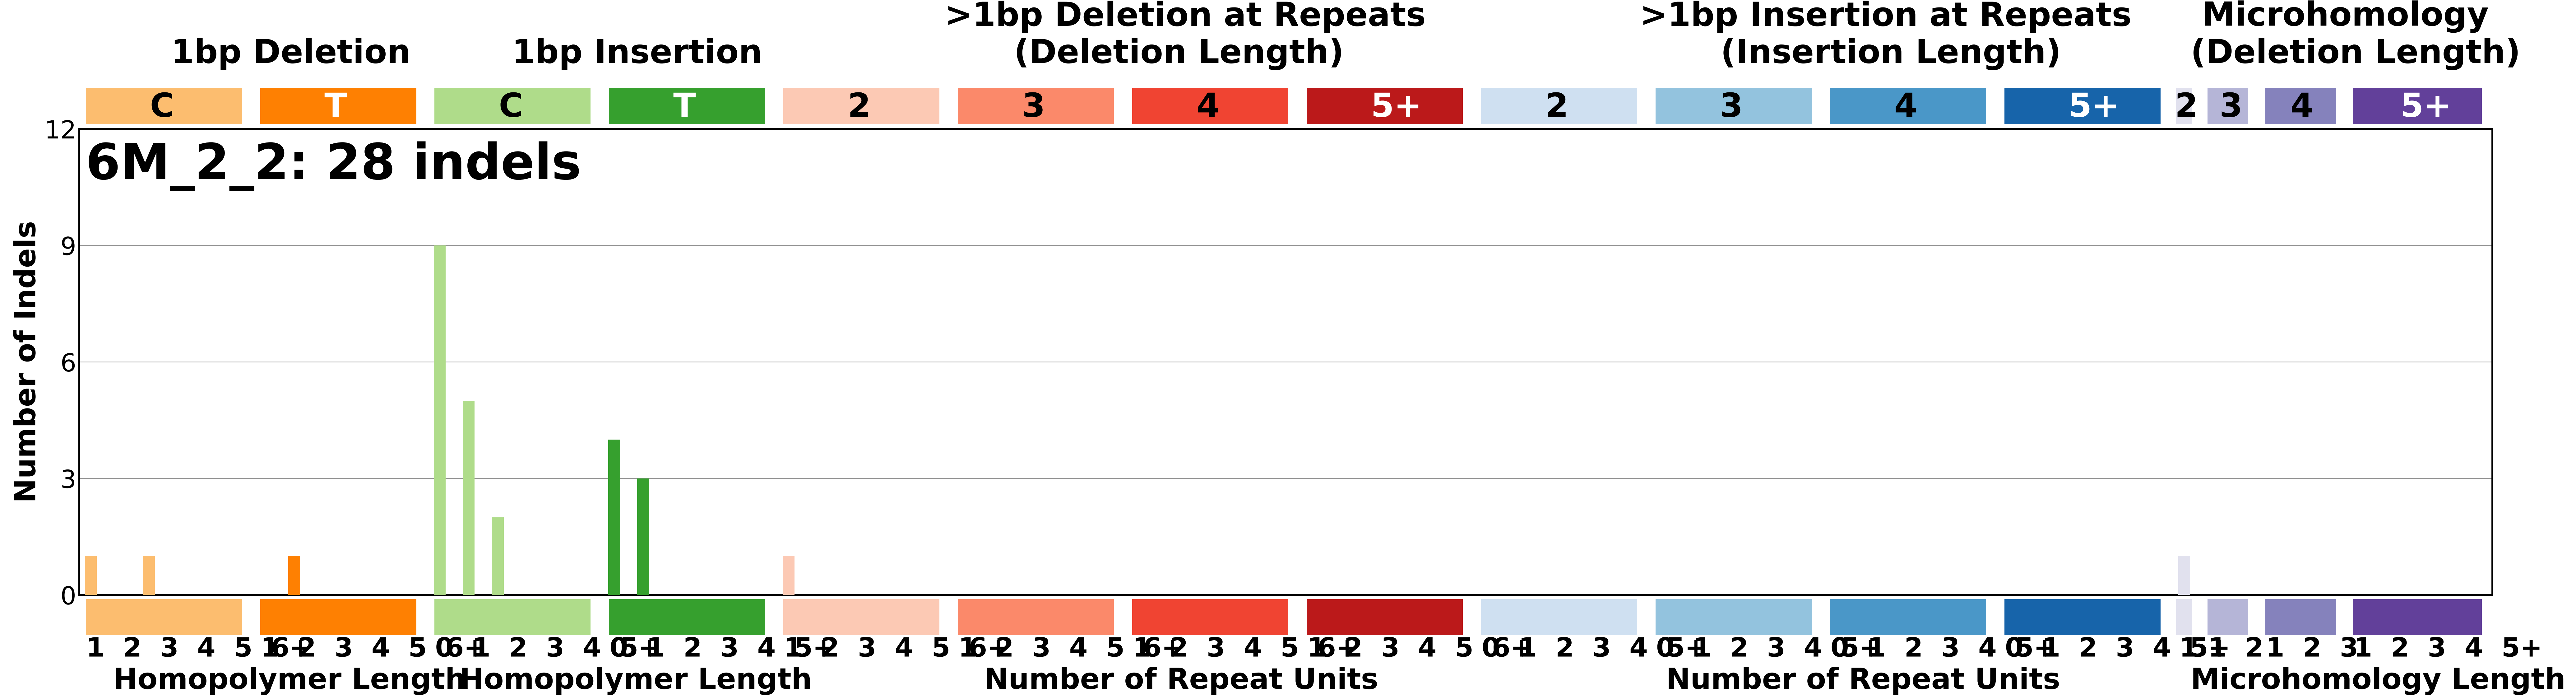

Supplement: s1 [file s1]
